# Supplementary material for: Prediction of distant metastasis in renal cell carcinoma using machine learning algorithms on the basis of the SEER database and a Chinese population
Source: Research Square preprint supplement (doi:10.21203/rs.3.rs-7531291/v1), 2025-10-13
Supplement: Supplementary file 1 [file 82b4a656c24b1998f8840b88.docx]

Supplementary table 2. The integrated model prediction results after fivefold cross-validation in the upsampling data.

| Model | Set | Auc. | Acc. | Sens. | Spec. |
| --- | --- | --- | --- | --- | --- |
| Bayes | Train data | 0.8484±0.0054 | 0.7021±0.0032 | 0.877±0.0087 | 0.6882±0.0033 |
| Test data | 0.8562±0.013 | 0.8298±0.0064 | 0.7282±0.0306 | 0.8377±0.0066 |
| External data | 0.7989±0.0466 | 0.8174±0.0142 | 0.6443±0.1008 | 0.8227±0.0144 |
| Decision Tree | Train data | 0.8707±0.0053 | 0.8507±0.0025 | 0.7396±0.0109 | 0.8596±0.0025 |
| Test data | 0.8825±0.0116 | 0.8397±0.0064 | 0.7913±0.0261 | 0.8435±0.0066 |
| External data | 0.8142±0.0554 | 0.8411±0.0134 | 0.7012±0.1036 | 0.845±0.014 |
| Logistic | Train data | 0.86±0.0051 | 0.8576±0.0024 | 0.7261±0.0111 | 0.8681±0.0024 |
| Test data | 0.8815±0.0118 | 0.8366±0.0066 | 0.7921±0.0258 | 0.8401±0.0067 |
| External data | 0.7983±0.061 | 0.8336±0.0141 | 0.7012±0.1036 | 0.8374±0.0144 |
| Neutral network | Train data | 0.87±0.0052 | 0.8507±0.0025 | 0.7396±0.0111 | 0.8596±0.0025 |
| Test data | 0.8828±0.0119 | 0.8397±0.0064 | 0.7912±0.0264 | 0.8434±0.0066 |
| External data | 0.8068±0.0578 | 0.8452±0.0132 | 0.7012±0.1036 | 0.8494±0.0135 |
| Random Forest | Train data | 0.8709±0.0052 | 0.8506±0.0025 | 0.74±0.011 | 0.8595±0.0025 |
| Test data | 0.8829±0.0117 | 0.8373±0.0063 | 0.7948±0.026 | 0.8408±0.0066 |
| External data | 0.8105±0.0556 | 0.8414±0.0134 | 0.7012±0.1036 | 0.8456±0.0141 |
| SVM | Train data | 0.8321±0.0059 | 0.85±0.0025 | 0.7354±0.0113 | 0.8592±0.0025 |
| Test data | 0.8388±0.0143 | 0.8377±0.0064 | 0.7877±0.0268 | 0.8416±0.0066 |
| External data | 0.8026±0.0554 | 0.9188±0.0106 | 0.4468±0.1062 | 0.9329±0.0096 |
| XGBoost | Train data | 0.8712±0.0052 | 0.8516±0.0025 | 0.74±0.011 | 0.8604±0.0025 |
| Test data | 0.8819±0.0117 | 0.8404±0.0063 | 0.7883±0.0269 | 0.8443±0.0066 |
| External data | 0.8162±0.0558 | 0.8452±0.0132 | 0.7012±0.1036 | 0.849±0.0135 |
