# Supplementary material for: Prediction of distant metastasis in renal cell carcinoma using machine learning algorithms on the basis of the SEER database and a Chinese population
Source: Research Square preprint supplement (doi:10.21203/rs.3.rs-7531291/v1), 2025-10-13
Supplement: Supplementary file 2 [file cef6300e498cd49f00171a10.docx]

Supplementary table 1. The integrated model prediction results after fivefold cross-validation in the downsampling data.

| Model | Set | Auc. | Acc. | Sens. | Spec. |
| --- | --- | --- | --- | --- | --- |
| Bayes | Train data | 0.8484±0.0054 | 0.7021±0.0032 | 0.877±0.0087 | 0.6882±0.0033 |
| Test data | 0.8562±0.013 | 0.8298±0.0064 | 0.7282±0.0306 | 0.8377±0.0066 |
| External data | 0.7989±0.0466 | 0.8174±0.0142 | 0.6443±0.1008 | 0.8227±0.0144 |
| Decision Tree | Train data | 0.8688±0.0052 | 0.854±0.0025 | 0.7318±0.0112 | 0.8638±0.0024 |
| Test data | 0.882±0.0117 | 0.8391±0.0065 | 0.7936±0.0261 | 0.8427±0.0067 |
| External data | 0.814±0.0568 | 0.8401±0.0136 | 0.7012±0.1036 | 0.8441±0.014 |
| Logistic | Train data | 0.8601±0.0052 | 0.8574±0.0024 | 0.7261±0.0112 | 0.8679±0.0023 |
| Test data | 0.8812±0.0119 | 0.8367±0.0064 | 0.7921±0.0258 | 0.8402±0.0067 |
| External data | 0.7992±0.061 | 0.8355±0.0139 | 0.7012±0.1036 | 0.8393±0.0142 |
| Neutral network | Train data | 0.8694±0.0053 | 0.8547±0.0025 | 0.7331±0.0114 | 0.8643±0.0025 |
| Test data | 0.8824±0.0118 | 0.8394±0.0064 | 0.7936±0.0261 | 0.843±0.0066 |
| External data | 0.8027±0.057 | 0.8395±0.0132 | 0.7012±0.1036 | 0.843±0.0138 |
| Random Forest | Train data | 0.8687±0.0052 | 0.8481±0.0025 | 0.741±0.0112 | 0.8566±0.0025 |
| Test data | 0.882±0.0118 | 0.838±0.0064 | 0.7955±0.0258 | 0.8413±0.0066 |
| External data | 0.8057±0.0572 | 0.8516±0.0136 | 0.7012±0.1036 | 0.856±0.0136 |
| SVM | Train data | 0.8576±0.0055 | 0.8196±0.0027 | 0.7704±0.0111 | 0.8236±0.0027 |
| Test data | 0.8685±0.0125 | 0.8439±0.0061 | 0.7818±0.0272 | 0.8487±0.0065 |
| External data | 0.8274±0.0546 | 0.8508±0.0135 | 0.7012±0.1036 | 0.8553±0.0137 |
| XGBoost | Train data | 0.8697±0.0053 | 0.8508±0.0025 | 0.7393±0.0113 | 0.8597±0.0025 |
| Test data | 0.8816±0.0119 | 0.8373±0.0064 | 0.7932±0.0255 | 0.8409±0.0066 |
| External data | 0.8079±0.0573 | 0.8414±0.0134 | 0.7012±0.1036 | 0.8456±0.0141 |
